# Supplementary material
Source: PubMed Central journal article supplement (PMC4426439)

## Supplementary Tables

**Table S1.** Baseline characteristics of Akita male mice with 5 graded *Tgfb1* expressions at age 40 weeks

|                              | L/L Akita                | L/+ Akita    | WT Akita    |
|------------------------------|--------------------------|--------------|-------------|
| Number of mice               | 10                       | 11           | 11          |
| Body weight (BW; g)          | 20.7 ± 0.9 <sup>†</sup>  | 25.0 ± 1.3   | 25.9 ± 1.5  |
| Kidney weight (right; mg)    | 179 ± 13 <sup>**</sup>   | 254 ± 13     | 254 ± 16    |
| Kidney weight / BW (‰)       | 8.50 ± 0.46 <sup>*</sup> | 10.24 ± 0.36 | 9.85 ± 0.46 |
| Heart weight (mg)            | 108 ± 5 <sup>**</sup>    | 123 ± 5      | 125 ± 4     |
| Heart weight / BW (‰)        | 4.50 ± 0.51              | 4.99 ± 0.20  | 4.95 ± 0.23 |
| Plasma cholesterol (mmol/L)  | 1.82 ± 0.19              | 2.31 ± 0.21  | 2.77 ± 0.12 |
| Plasma triglyceride (mmol/L) | 1.17 ± 0.15              | 1.26 ± 0.14  | 1.51 ± 0.30 |

|                           | H/+ Akita   | H/H Akita                  |
|---------------------------|-------------|----------------------------|
| Number of mice            | 9           | 8                          |
| Body weight (BW; g)       | 24.4 ± 1.3  | 22.1 ± 1.0                 |
| Kidney weight (right; mg) | 235 ± 16    | 279 ± 19                   |
| Kidney weight /BW (‰)     | 9.65 ± 0.43 | 12.65 ± 0.69 <sup>**</sup> |
| Heart weight (mg)         | 121 ± 3     | 100 ± 4 <sup>*</sup>       |
| Heart weight /BW (‰)      | 5.03 ± 0.16 | 4.64 ± 0.26                |

|                                   |             |             |
|-----------------------------------|-------------|-------------|
| Plasma total cholesterol (mmol/L) | 2.34 ± 0.27 | 1.93 ± 0.39 |
| Plasma triglyceride (mmol/L)      | 1.62 ± 0.12 | 1.56 ± 0.23 |

---

\* $P < 0.05$ , \*\* $P < 0.01$  vs. WT:A/+.

**Table S2.** Primers and probes for quantification of mRNA with real-time quantitative reverse transcription-PCR.

Gene Symbol

---

|              |              |                                            |
|--------------|--------------|--------------------------------------------|
| <i>Tgfb1</i> | (Fwd primer) | 5'-TGACGTCACTGGAGTTGTACGG-3'               |
|              | (Rev primer) | 5'-GGTTCATGTCATGGATGGATGGTGC-3'            |
|              | (Probe)      | 5'-FAM-TTCAGCGCTCACGTCTCTTGTGACAG-Tamra-3' |
| <i>Nphs1</i> | (Fwd primer) | 5'-CAGCTGCTAGTCTGCGAGG-3'                  |
|              | (Rev primer) | 5'-ATCAATGACAGGAGGTCCTG-3'                 |
|              | (Probe)      | 5'-FAM-TCCAACCCAGCCTTGGCCACTC-Tamra-3'     |
| <i>Nphs2</i> | (Fwd primer) | 5'-GTGAGGAGGGCACGGAAGT-3'                  |
|              | (Rev primer) | 5'-TAATCCAGAGGGCTTGATGC-3'                 |
|              | (Probe)      | 5'-FAM-CCTCTGGTCGCTCGCTCTCCAGC-Tamra-3'    |
| <i>Lrp2</i>  | (Fwd primer) | 5'-GAATCCGCCAAGACACTGAT-3'                 |
|              | (Rev primer) | 5'-ACAAGAGTCCCCTGGGCATA-3'                 |
|              | (Probe)      | 5'-FAM-CCCTCGCTCAGCTGCTTCCCGTAA-Tamra-3'   |
| <i>Cubn</i>  | (Fwd primer) | 5'-TTTGGACCGTTCTGTGGCAT-3'                 |
|              | (Rev primer) | 5'-GGAATCTTATGAAGACCCGA-3'                 |
|              | (Probe)      | 5'-FAM-ACACTGTGGTAGCACCCCTTTCATGC-Tamra-3' |

*Fcrp* (Fwd primer) 5'-ACGTGGAGATGAGCACCATT-3'  
(Rev primer) 5'-GCACAGAAGATCTGGCTGAT-3'  
(Probe) 5'-FAM-TGCCAGCCCCTCATGCTCCTCT-Tamra-3'

*Actb* (Fwd primer) 5'-AAGAGCTATGAGCTGCCTGA-3'  
(Rev primer) 5'-ACGGATGTCAACGTCACACT-3'  
(Probe) 5'-FAM-CACTATTGGCAACGAGCGGTTCCG-Tamra-3'

---

## Supplementary Figure Legends

**Fig. S1.** Heart rate of Akita mice having 5 graded expression levels of TGF $\beta$ 1 at age 40 weeks.

**Fig. S2.** Urinary albumin excretion in non-diabetic mice having 5 graded expression levels of TGF $\beta$ 1 at age 40 weeks. \*\* $P < 0.01$  vs. WT.

**Fig. S3.** Plasma urea nitrogen levels.

**Fig. S4.** Plasma creatinine levels.

**Fig. S5.** Creatinine clearance.

**Fig. S6.** Plasma aldosterone levels of Akita mice having 5 graded expression levels of TGF $\beta$ 1 at age 40 weeks. \*\* $P < 0.01$  vs. WT:A/+.

**Fig. S7.** Transmission electron microscopy in the kidney of mice having 5 graded expression levels of TGF $\beta$ 1 at 40 weeks of age. Color-coded scale bar = 1  $\mu$ m. **A-E.** Glomerular basement membrane (GBM) in non-diabetic mice having 5 graded expression levels of TGF $\beta$ 1. **A.** L/L. **B.** L/+. **C.** WT. **D.** H/+. **E.** H/H. **F-J.** Tubular basement membrane (TBM) of proximal tubules in non-diabetic mice having 5 graded expression levels of TGF $\beta$ 1. **F.** L/L. **G.** L/+. **H.** WT. **I.** H/+. **J.** H/H. **K.** Fraction of PAS-positive mesangial material per total glomerular tuft cross-sectional area. **L.** Fraction of open capillary area per total glomerular tuft cross-sectional area. **M.** Thickness of GBM. **N.** Thickness of TBM in the proximal tubule. **O.** Width of foot processes of the podocyte. **I,**  $P$  value for the interaction of TGF $\beta$ 1 and Akita genotype. Bars and images are color coded as indicated. \* $P < 0.05$ , \*\* $P < 0.01$  vs. WT or WT:A/+. **P.** Nodular lesions (arrowheads) in the glomerulus in H/H:A/+ mouse; color-coded scale bar = 50  $\mu$ m; periodic acid-Schiff (PAS) staining with hematoxylin.

**Fig. S8.** Plasma glucose levels.

**Fig. S9.** Systolic blood pressure (sBP). \* $P < 0.05$  vs. L/L:A/+.

**Fig. S10.** Transmission electron microscopy in the kidney of L/L:A/+ mice having tissue specific Cre recombinases at 40 weeks of age. Color-coded scale bar = 1  $\mu$ m. **A-B.** GBM. **C-D.** TBM. **A, C.** L/L:A/+ mice without Cre (L/L:A/+). **B, D.** L/L:A/+ mice with podocin promoter-driven Cre (L/L:A/+ N). **C, F.** L/L:A/+ mice with  $\gamma$ -glutamyl transferase (Ggt) 1 promoter-driven Cre (L/L:A/+ T).

**Fig. S11.** Urine glucose excretion in non-diabetic mice having 5 graded expression levels of TGF $\beta$ 1. \*\* $P < 0.01$  vs. WT.

**Fig. S1**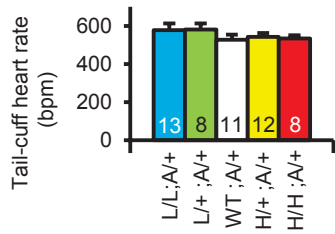**Fig. S2**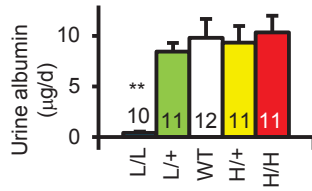**Fig. S3**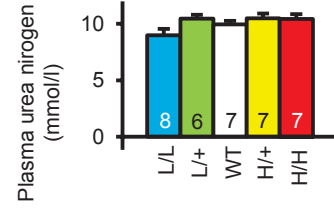**Fig. S4**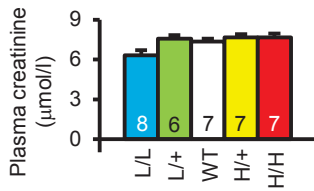**Fig. S5**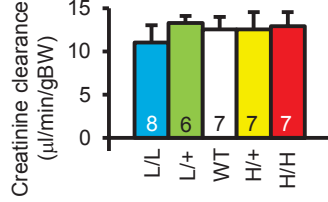**Fig. S6**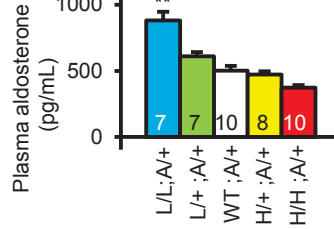**Fig. S7**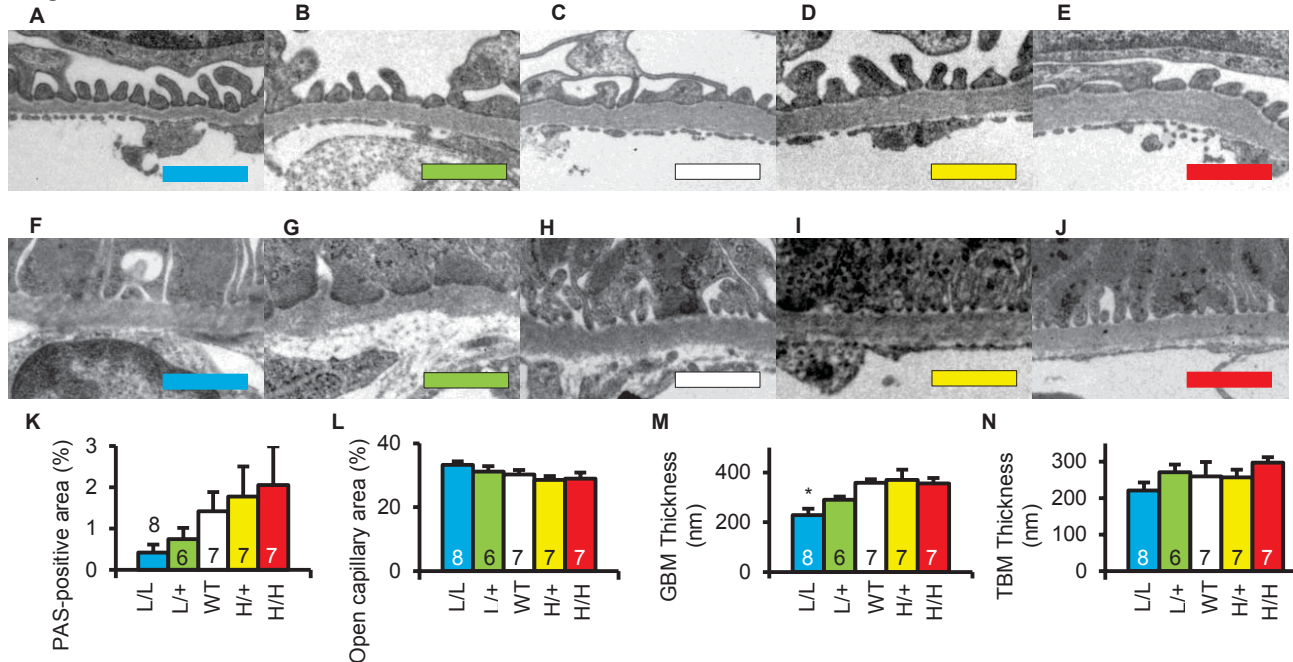**O**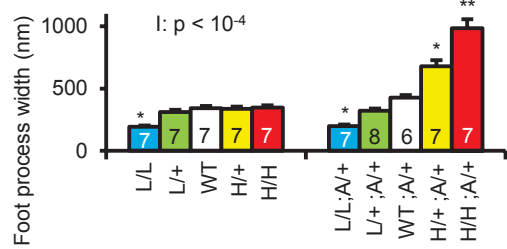**P**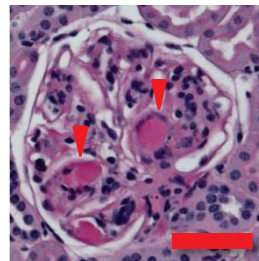**Fig. S11**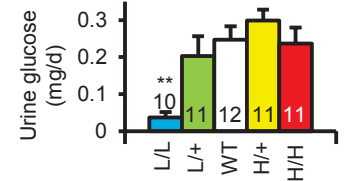**Fig. S8**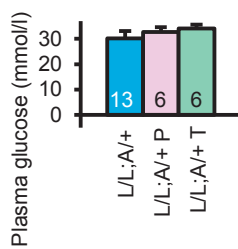**Fig. S9**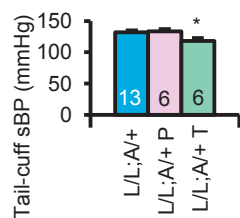**Fig. S10**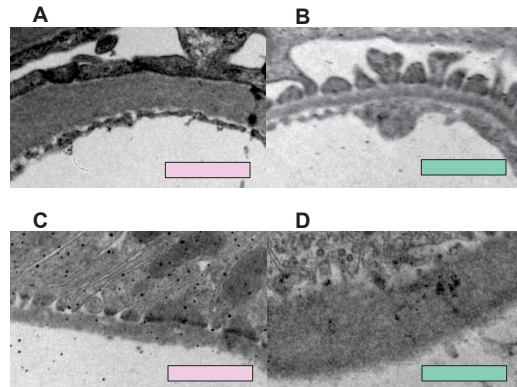

Supplement: pnas.1504777112.sapp.pdf [file pnas.1504777112.sapp.pdf]
